# Supplementary material for: A small bimetallic Ag3Cu2 nanocluster with dual emissions within and against Kasha's rule
Source: Royal Society of Chemistry journal article supplement (doi:10.1039/d0nr00471e), 2020-01-01
Supplement: d0nr00471e1.pdf [file d0nr00471e1.pdf]

## Supporting Information for

# A Small Bimetallic Ag<sub>3</sub>Cu<sub>2</sub> Nanocluster with Dual Emissions within and against Kasha's Rule

Rajini Anumula,<sup>†,§</sup> Pin Xiao,<sup>‡,§</sup> Chaonan Cui,<sup>†</sup> Haiming Wu,<sup>†</sup> Ganglong Cui,<sup>‡,\*</sup> Wei-Hai Fang,<sup>‡</sup>  
Zhixun Luo,<sup>†,\*</sup> and Jiannian Yao<sup>†</sup>

<sup>†</sup> State Key Laboratory for Structural Chemistry of Unstable and Stable Species, and Key Laboratory of Photochemistry, Institute of Chemistry, Chinese Academy of Sciences, Beijing 100090, China.

<sup>‡</sup> Key Laboratory of Theoretical and Computational Photochemistry, College of Chemistry, Beijing Normal University, Beijing 100875, China.

\* Correspondence. Email: ganglong.cui@bnu.edu.cn (G.C.); zxlue@iccas.ac.cn (Z.L.)

§ These authors contributed equally to this paper and share the first authorship.

## Contents

|                                                                                                                |    |
|----------------------------------------------------------------------------------------------------------------|----|
| <b>S1. Experimental Methods</b> .....                                                                          | 2  |
| <b>S2. TGA and XPS Patterns</b> .....                                                                          | 2  |
| <b>S3. Spectroscopic Characterization</b> .....                                                                | 4  |
| <b>S4. Details of Single Crystal Data of Ag<sub>3</sub>Cu<sub>2</sub>(SPhMe<sub>2</sub>)<sub>6</sub></b> ..... | 5  |
| <b>S5. DFT and TDDFT Calculations</b> .....                                                                    | 30 |

## S1. Experimental Methods

**Chemicals.** All reagents were of analytical grade and used without further purification. Also used, were silver nitrate ( $\text{AgNO}_3$ , Alfa Aesar, 98%), copper chloride ( $\text{CuCl}_2$ , Acros organics), 2,4-dimethylbenzenethiol ( $\text{HSPhMe}_2$ , TCI 98%), sodium borohydride ( $\text{NaBH}_4$ , Acros 99.99%), tetraphenyl phosphonium bromide ( $\text{PPh}_4\text{Br}$ , Acros 99.99%). Distilled water was collected from Milli-Q (Millipore apparatus).

**Characterization.** Electrospray ionization time-of-flight mass spectrometry (ESI-TOF-MS) measurements were conducted by a MicroTOF-QIII High-resolution Mass Spectrometer in the negative ionization mode. The UV-Vis absorption spectra were collected using an UV-3600 Shimadzu UV-Vis-NIR Spectrophotometer. Photoluminescence spectra were recorded by a Horiba Scientific Fluoromax-4 spectrofluorometer.

**Single crystal parsing.** Single crystals of  $\text{Ag}_3\text{Cu}_2$  clusters were grown for 4-5 days at  $-10\text{ }^\circ\text{C}$  by layering hexane over a concentrated DCM solution of clusters. The orange color crystals grown from the mixture were found to be suitable for X-ray diffraction. The diffraction data of  $\text{Ag}_3\text{Cu}_2(\text{SPhMe}_2)_6$  were collected on an XtaLAB AFC10 (RCD3): fixed-chi single crystal X-ray diffractometer with Mo-K $\alpha$  radiation ( $\lambda=0.71073\text{ \AA}$ ) at 173.15 K. Using Olex2, the structure was solved and refined using Full-matrix least-squares minimization based on F2 with structure solution program SHELXTL using Intrinsic Phasing with the ShelXTL refinement package. All non-hydrogen atoms were refined anisotropically, and all of the hydrogen atoms were set in geometrically calculated positions and refined isotropically using a riding model.

## S2. TGA and XPS Patterns

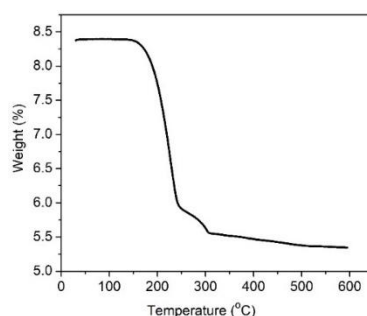

**Fig. S1** The Thermogravimetric analysis of the  $\text{Ag}_3\text{Cu}_2$  clusters.

The XPS spectrum of Ag 3d shows two peaks at binding energy values of 368.4 and 373.0 eV assigned to Ag 3d<sub>5/2</sub> and Ag 3d<sub>3/2</sub>, suggesting the Ag valence state between Ag (0) and Ag (I). In the Cu 2p region, the spectrum shows two peaks at 932.3 and 952.0 eV, assigned to binding energy values of 2p<sub>3/2</sub> and 2p<sub>1/2</sub> electrons of Cu (0). No feature for Cu (II) electrons was observed, indicating the absence of Cu<sup>2+</sup> in Ag<sub>3</sub>Cu<sub>2</sub> clusters. That is, the valence state of the Cu atoms also lies in between 0 and +1 oxidation state. In addition, the binding energy of S 2p<sub>3/2</sub> shows the peak at 162.0 eV which is characteristic of thiolates indicative of chemisorbed S species; the C 1s peak was located at 285.0 eV corresponding to unaffected characteristic of the ligand chain.

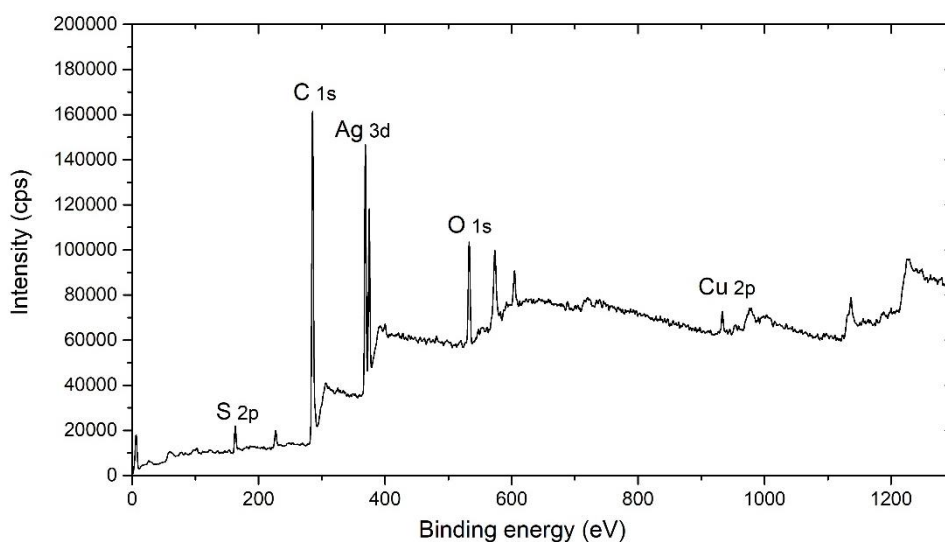

**Fig. S2** The survey spectrum of XPS patterns of the Ag<sub>3</sub>Cu<sub>2</sub> clusters.

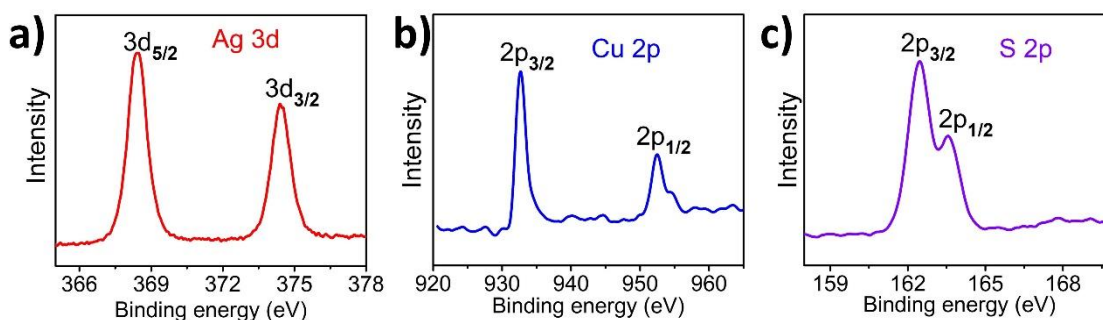

**Fig. S3** XPS patterns of Ag 3d (a), S 2p (b) and Cu 2p (c) of the Ag<sub>3</sub>Cu<sub>2</sub> clusters.

### S3. Spectroscopic Characterization

Optical properties and luminescence mechanism of fluorescent nanomaterials are closely related to the development of optical technologies used in laser, lighting, and information display devices. Metal clusters bear discrete electronic states and exhibit molecule-like optical properties, allowing size-dependent fluorescence from ultraviolet-visible (UV-vis) to near-infrared (NIR) region. Despite predictable challenge in synthesizing very small bimetallic NCs, it is found that doping a hetero-atom into a small cluster could be much more sensitive to tune the property of nascent clusters. Among various approaches to synthesize fluorescent metal nanoclusters (NCs), a general issue lies in relatively low quantum yields of such metal NCs compared to fluorescent larger nanoparticles, quantum dots (QDs), and organic nanomaterials, which significantly limits practical applications of luminous metal NCs.

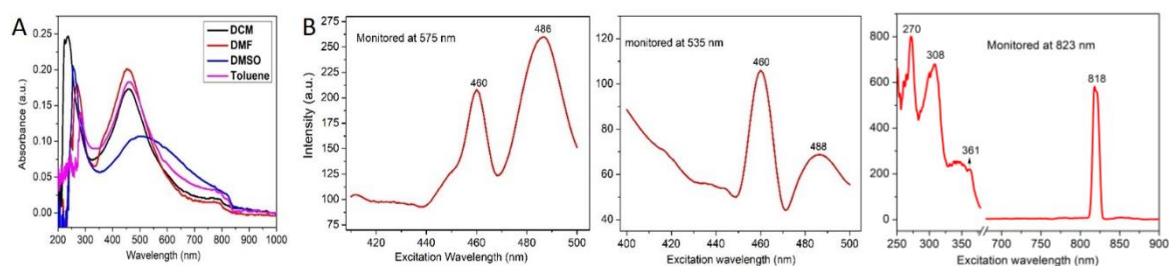

**Fig. S4 (A)** The UV-vis absorbance spectra of the  $\text{Ag}_3\text{Cu}_2$  clusters in different solvents. **(B)** The fluorescence excitation spectra of  $\text{Ag}_3\text{Cu}_2(\text{SPhMe}_2)_6$  clusters dissolved in DCM, monitored at 575nm, 535 nm and 823 nm respectively.

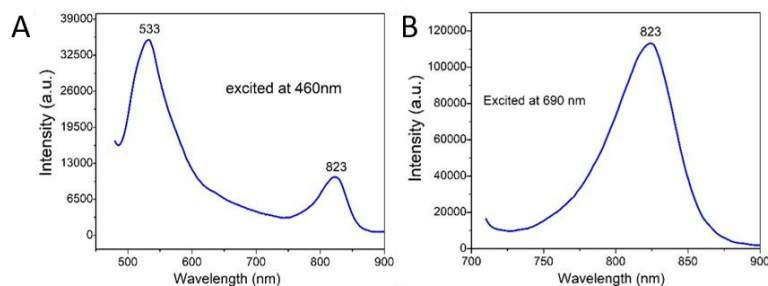

**Fig. S5** Fluorescence emission spectra of  $\text{Ag}_3\text{Cu}_2(\text{SPhMe}_2)_6$  clusters dissolved in DCM, excited at 460nm **(A)** and 690nm **(B)** respectively.

#### S4. Details of Single Crystal Data of $\text{Ag}_3\text{Cu}_2(\text{SPhMe}_2)_6$

Dark-orange block crystal of  $\text{C}_{73}\text{H}_{76}\text{Ag}_3\text{Cl}_2\text{Cu}_2\text{PS}_6$ , dimensions  $0.289 \times 0.163 \times 0.156 \text{ mm}^3$ ,  $M_r = 1698.25$ , monoclinic,  $P 1 21/n 1$ ,  $a = 14.5564(11) \text{ \AA}$ ,  $b = 33.710(3) \text{ \AA}$ ,  $c = 14.6416(11) \text{ \AA}$ ,  $\alpha = 90^\circ$ ,  $\beta = 94.2190(10)^\circ$ ,  $\gamma = 90^\circ$ ,  $V = 7165.2(9) \text{ \AA}^3$ ,  $T = 173.15 \text{ K}$ ,  $Z = 4$ ,  $Z' = 1$ ,  $\mu (\text{Mo K}\alpha) = 3.508 \text{ mm}^{-1}$ , 56439 reflections measured, 16363 unique ( $R_{\text{int}} = 0.0365$ ) which were used in all calculations. The final  $wR2$  was 0.1117 (all data) and  $R1$  was 0.0529 ( $I > 2(I)$ ).

The  $\text{Ag}_3\text{Cu}_2$  cluster is linked together by Ag–S–Cu, Cu–Ag, and Ag–Ag bonds. There is no bonding between the two Cu atoms indicating negligible Cu–Cu interactions in this cluster; in contrast, there is argentophilic interaction since the Ag1–Ag3 bond distance of  $3.300 \text{ \AA}$  (cal.  $3.331 \text{ \AA}$ ) is shorter than the sum of the van der Waals radii of two Ag atoms ( $3.440 \text{ \AA}$ ), pertaining to the weak  $d_{10} - d_{10}$  interaction. The silver atoms are bound to the Cu1 atom with bond distances of  $2.871\text{--}3.039 \text{ \AA}$  (cal.  $2.862\text{--}2.991 \text{ \AA}$ ) and Cu2 atom with  $2.927\text{--}2.994 \text{ \AA}$  (cal.  $2.874\text{--}2.967 \text{ \AA}$ ) in a tetrahedral fashion. Comparing with previously published studies, most metal NCs (typically  $\text{M}_{25}$ ,  $\text{M}=\text{Au}$ ,  $\text{Ag}$ ,  $\text{Cu}$ , etc.) favor an icosahedral 13-atom core structure, while a few others correspond to a metallic core of 12-atom cage, such as  $\text{Ag}_{44}(\text{SR})_{30}$  and  $\text{Au}_{32}$  NCs. Another interesting cluster,  $\text{Al}_{50}\text{Cp}^*_{12}$  ( $\text{Cp}^* = \text{C}_5\text{Me}_5$ ), bears an  $\text{Al}_8$  center surrounded by 30 Al atoms to form 12 pentagonal faces that are capped by 12 Al–Cp\* moieties.

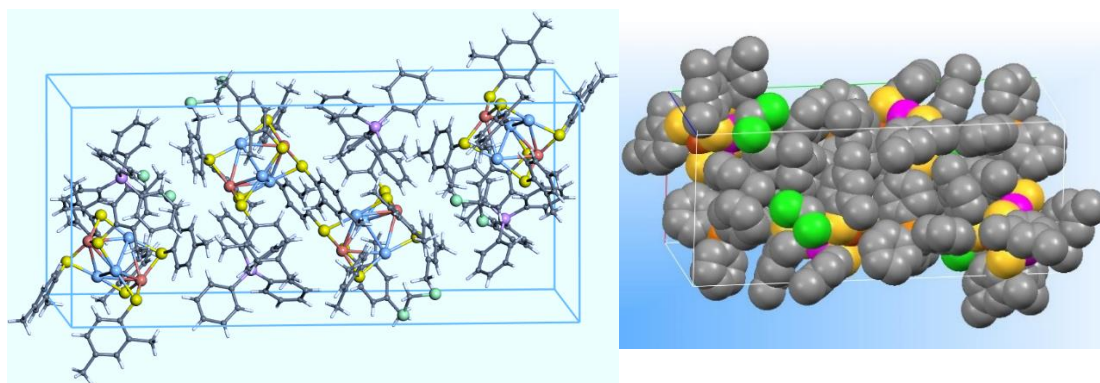

**Fig. S6** The single-crystal packing structure of the  $\text{Ag}_3\text{Cu}_2$  clusters. Color scheme: blue, silver; red, copper; yellow, sulfur; dark gray, carbon; purple, phosphorus; green, chlorine; white, hydrogen.

**Table S1. Crystal data and structure refinement**

|                                   |                                                                                        |
|-----------------------------------|----------------------------------------------------------------------------------------|
| Identification code               | mx6667                                                                                 |
| Empirical formula                 | C73 H76 Ag3 Cl2 Cu2 P S6                                                               |
| Formula weight                    | 1698.25                                                                                |
| Temperature                       | 173.15 K                                                                               |
| Wavelength                        | 0.71073 Å                                                                              |
| Crystal system                    | Monoclinic                                                                             |
| Space group                       | P 1 21/n 1                                                                             |
| Unit cell dimensions              | a = 14.5564(11) Å = 90°.<br>b = 33.710(3) Å = 94.2190(10)°<br>c = 14.6416(11) Å = 90°. |
| Volume                            | 7165.2(9) Å <sup>3</sup>                                                               |
| Z                                 | 4                                                                                      |
| Density (calculated)              | 1.574 Mg/m <sup>3</sup>                                                                |
| Absorption coefficient            | 1.702 mm <sup>-1</sup>                                                                 |
| F(000)                            | 3432                                                                                   |
| Crystal size                      | 0.289 x 0.163 x 0.156 mm <sup>3</sup>                                                  |
| Theta range for data collection   | 1.208 to 27.486°.                                                                      |
| Index ranges                      | -18<=h<=18, -43<=k<=43, -19<=l<=18                                                     |
| Reflections collected             | 56439                                                                                  |
| Independent reflections           | 16363 [R(int) = 0.0365]                                                                |
| Completeness to theta = 25.242°   | 99.7 %                                                                                 |
| Absorption correction             | Semi-empirical from equivalents                                                        |
| Max. and min. transmission        | 1.00000 and 0.87228                                                                    |
| Refinement method                 | Full-matrix least-squares on F <sup>2</sup>                                            |
| Data / restraints / parameters    | 16363 / 0 / 796                                                                        |
| Goodness-of-fit on F <sup>2</sup> | 1.134                                                                                  |
| Final R indices [I>2sigma(I)]     | R1 = 0.0494, wR2 = 0.1095                                                              |
| R indices (all data)              | R1 = 0.0529, wR2 = 0.1117                                                              |
| Extinction coefficient            | n/a                                                                                    |
| Largest diff. peak and hole       | 1.431 and -1.181 e.Å <sup>-3</sup>                                                     |

**Table S2.** Atomic coordinates ( $\times 10^4$ ) and equivalent isotropic displacement parameters ( $\text{\AA}^2 \cdot 10^3$ ) for  $\text{Ag}_3\text{Cu}_2(\text{SPhMe}_2)_6$ .  $U(\text{eq})$  is defined as one third of the trace of the orthogonalized  $U^{ij}$  tensor.

|     | x        | y       | z        | U(eq) |
|-----|----------|---------|----------|-------|
| Ag1 | 8651(1)  | 3813(1) | 6588(1)  | 43(1) |
| C1  | 9367(3)  | 3832(1) | 8819(3)  | 34(1) |
| Cu1 | 7573(1)  | 4300(1) | 7760(1)  | 31(1) |
| S1  | 9118(1)  | 4189(1) | 7929(1)  | 39(1) |
| S2  | 6812(1)  | 4697(1) | 6722(1)  | 40(1) |
| Ag2 | 6470(1)  | 4078(1) | 5991(1)  | 44(1) |
| Cu2 | 7216(1)  | 3252(1) | 5937(1)  | 27(1) |
| C2  | 10028(3) | 3533(1) | 8745(3)  | 40(1) |
| Ag3 | 7095(1)  | 3476(1) | 7867(1)  | 44(1) |
| S3  | 8567(1)  | 3409(1) | 5247(1)  | 37(1) |
| C3  | 10211(3) | 3277(1) | 9486(3)  | 45(1) |
| S4  | 5927(1)  | 3503(1) | 5180(1)  | 37(1) |
| C4  | 9780(3)  | 3313(1) | 10298(3) | 47(1) |
| S5  | 7238(1)  | 2840(1) | 7171(1)  | 36(1) |
| C5  | 9152(3)  | 3615(2) | 10363(3) | 48(1) |
| C6  | 8943(3)  | 3866(1) | 9634(3)  | 41(1) |
| S6  | 6685(1)  | 4012(1) | 8834(1)  | 38(1) |
| C7  | 10539(4) | 3482(2) | 7895(4)  | 65(2) |
| C8  | 9980(4)  | 3021(2) | 11074(4) | 70(2) |
| C9  | 7578(3)  | 4959(1) | 6031(3)  | 38(1) |
| C10 | 7253(3)  | 5125(1) | 5191(3)  | 42(1) |
| C11 | 7848(3)  | 5357(1) | 4726(3)  | 49(1) |
| C12 | 8761(3)  | 5423(1) | 5032(4)  | 51(1) |
| C13 | 9072(3)  | 5246(1) | 5841(4)  | 55(1) |
| C14 | 8491(3)  | 5020(1) | 6338(4)  | 50(1) |
| C15 | 6281(3)  | 5052(2) | 4791(4)  | 57(1) |

|     |          |         |          |       |
|-----|----------|---------|----------|-------|
| C16 | 9381(4)  | 5676(2) | 4495(4)  | 70(2) |
| C17 | 8259(2)  | 3712(1) | 4272(3)  | 31(1) |
| C18 | 8158(2)  | 3531(1) | 3406(3)  | 32(1) |
| C19 | 7928(3)  | 3766(1) | 2647(3)  | 38(1) |
| C20 | 7842(3)  | 4176(1) | 2691(3)  | 42(1) |
| C21 | 7961(3)  | 4348(1) | 3557(3)  | 42(1) |
| C22 | 8162(3)  | 4122(1) | 4336(3)  | 37(1) |
| C23 | 8317(3)  | 3093(1) | 3297(3)  | 45(1) |
| C24 | 7626(4)  | 4418(2) | 1845(4)  | 65(2) |
| C25 | 4874(3)  | 3363(1) | 5665(3)  | 33(1) |
| C26 | 4044(3)  | 3526(1) | 5304(3)  | 39(1) |
| C27 | 3227(3)  | 3391(1) | 5636(3)  | 45(1) |
| C28 | 3197(3)  | 3098(1) | 6304(3)  | 42(1) |
| C29 | 4037(3)  | 2948(1) | 6666(3)  | 41(1) |
| C30 | 4861(3)  | 3079(1) | 6353(3)  | 36(1) |
| C31 | 4016(4)  | 3838(2) | 4569(4)  | 57(1) |
| C32 | 2298(3)  | 2943(2) | 6597(4)  | 61(1) |
| C33 | 8369(3)  | 2660(1) | 7498(3)  | 32(1) |
| C34 | 8612(3)  | 2542(1) | 8401(3)  | 37(1) |
| C35 | 9478(3)  | 2372(1) | 8597(3)  | 41(1) |
| C36 | 10109(3) | 2325(1) | 7939(3)  | 40(1) |
| C37 | 9853(3)  | 2446(1) | 7050(3)  | 43(1) |
| C38 | 8997(3)  | 2612(1) | 6834(3)  | 40(1) |
| C39 | 7995(3)  | 2616(2) | 9168(3)  | 51(1) |
| C40 | 11055(3) | 2159(2) | 8176(4)  | 55(1) |
| C41 | 5508(3)  | 4131(1) | 8536(3)  | 32(1) |
| C42 | 5026(3)  | 4361(1) | 9142(3)  | 33(1) |
| C43 | 4117(3)  | 4456(1) | 8902(3)  | 37(1) |
| C44 | 3637(3)  | 4322(1) | 8102(3)  | 41(1) |
| C45 | 4116(3)  | 4088(1) | 7518(3)  | 44(1) |
| C46 | 5035(3)  | 3993(1) | 7731(3)  | 40(1) |
| C47 | 5483(3)  | 4498(1) | 10041(3) | 46(1) |



|     |         |         |         |        |
|-----|---------|---------|---------|--------|
| C48 | 2634(3) | 4414(2) | 7904(4) | 59(1)  |
| P1  | 2586(1) | 3897(1) | 1417(1) | 28(1)  |
| C49 | 1854(3) | 3753(1) | 2297(3) | 34(1)  |
| C50 | 2150(3) | 3452(1) | 2897(3) | 42(1)  |
| C51 | 1589(3) | 3335(2) | 3578(3) | 50(1)  |
| C52 | 752(3)  | 3522(2) | 3665(3) | 49(1)  |
| C53 | 468(3)  | 3823(2) | 3085(3) | 49(1)  |
| C54 | 1014(3) | 3942(1) | 2392(3) | 40(1)  |
| C55 | 2098(2) | 4318(1) | 801(2)  | 28(1)  |
| C56 | 2483(3) | 4696(1) | 859(3)  | 32(1)  |
| C57 | 2055(3) | 5006(1) | 375(3)  | 35(1)  |
| C58 | 1246(3) | 4943(1) | -163(3) | 36(1)  |
| C59 | 869(3)  | 4568(1) | -235(3) | 36(1)  |
| C60 | 1287(3) | 4255(1) | 244(3)  | 34(1)  |
| C61 | 2686(3) | 3509(1) | 593(3)  | 31(1)  |
| C62 | 3026(3) | 3616(1) | -239(3) | 41(1)  |
| C63 | 3144(3) | 3331(1) | -904(3) | 47(1)  |
| C64 | 2922(3) | 2942(1) | -745(3) | 47(1)  |
| C65 | 2577(3) | 2834(1) | 73(3)   | 45(1)  |
| C66 | 2462(3) | 3114(1) | 753(3)  | 37(1)  |
| C67 | 3708(2) | 4009(1) | 1943(3) | 31(1)  |
| C68 | 4465(3) | 3773(1) | 1788(3) | 42(1)  |
| C69 | 5316(3) | 3863(2) | 2213(3) | 51(1)  |
| C70 | 5425(3) | 4192(2) | 2776(3) | 47(1)  |
| C71 | 4679(3) | 4429(1) | 2926(3) | 41(1)  |
| C72 | 3813(3) | 4334(1) | 2530(3) | 35(1)  |
| Cl1 | 4721(1) | 7415(1) | 540(2)  | 106(1) |
| Cl2 | 3610(2) | 6845(1) | -564(1) | 88(1)  |
| C73 | 4399(5) | 6929(3) | 366(8)  | 153(5) |

---

**Table S3.** Anisotropic displacement parameters ( $\text{\AA}^2 \cdot 10^3$ ) for  $\text{Ag}_3\text{Cu}_2(\text{SPhMe}_2)_6$ . The anisotropic displacement factor exponent takes the form:  $-2^2 [h^2 a^{*2} U^{11} + \dots + 2 h k a^* b^* U^{12}]$

|     | U11   | U22   | U33   | U23    | U13    | U12    |
|-----|-------|-------|-------|--------|--------|--------|
| Ag1 | 42(1) | 58(1) | 29(1) | -1(1)  | 0(1)   | -9(1)  |
| C1  | 29(2) | 34(2) | 37(2) | -3(2)  | -2(2)  | -5(2)  |
| Cu1 | 30(1) | 29(1) | 34(1) | -1(1)  | 1(1)   | -1(1)  |
| S1  | 40(1) | 42(1) | 35(1) | 4(1)   | -2(1)  | -7(1)  |
| S2  | 38(1) | 31(1) | 53(1) | -4(1)  | 6(1)   | -3(1)  |
| Ag2 | 46(1) | 32(1) | 53(1) | -5(1)  | 5(1)   | -11(1) |
| Cu2 | 27(1) | 27(1) | 26(1) | -1(1)  | 3(1)   | 0(1)   |
| C2  | 34(2) | 41(2) | 43(2) | -13(2) | -3(2)  | 1(2)   |
| Ag3 | 45(1) | 37(1) | 51(1) | -8(1)  | 10(1)  | 7(1)   |
| S3  | 33(1) | 47(1) | 31(1) | 4(1)   | 4(1)   | 3(1)   |
| C3  | 40(2) | 30(2) | 62(3) | -6(2)  | -10(2) | 6(2)   |
| S4  | 43(1) | 36(1) | 33(1) | -2(1)  | 4(1)   | -8(1)  |
| C4  | 39(2) | 43(2) | 57(3) | 11(2)  | -6(2)  | -9(2)  |
| S5  | 32(1) | 34(1) | 42(1) | -4(1)  | 2(1)   | 3(1)   |
| C5  | 42(2) | 58(3) | 44(2) | 12(2)  | 7(2)   | 0(2)   |
| C6  | 37(2) | 45(2) | 42(2) | 4(2)   | 6(2)   | 6(2)   |
| S6  | 39(1) | 37(1) | 39(1) | -5(1)  | 7(1)   | 2(1)   |
| C7  | 51(3) | 92(4) | 51(3) | -23(3) | 0(2)   | 21(3)  |
| C8  | 70(4) | 53(3) | 86(4) | 31(3)  | -10(3) | -10(3) |
| C9  | 39(2) | 28(2) | 48(2) | -6(2)  | 3(2)   | -5(2)  |
| C10 | 38(2) | 43(2) | 46(2) | -9(2)  | 3(2)   | -2(2)  |
| C11 | 55(3) | 50(3) | 42(2) | -4(2)  | 5(2)   | -7(2)  |
| C12 | 51(3) | 45(2) | 58(3) | -3(2)  | 8(2)   | -13(2) |
| C13 | 40(3) | 46(3) | 76(4) | 2(2)   | -1(2)  | -11(2) |
| C14 | 46(3) | 37(2) | 64(3) | 6(2)   | -6(2)  | -7(2)  |
| C15 | 43(3) | 73(3) | 52(3) | 1(3)   | -7(2)  | -6(2)  |

|     |       |       |       |        |       |        |
|-----|-------|-------|-------|--------|-------|--------|
| C16 | 66(4) | 70(4) | 75(4) | 10(3)  | 13(3) | -21(3) |
| C17 | 24(2) | 38(2) | 32(2) | 0(2)   | 3(1)  | -3(1)  |
| C18 | 23(2) | 41(2) | 34(2) | -3(2)  | 5(1)  | -6(2)  |
| C19 | 32(2) | 54(2) | 28(2) | -3(2)  | 3(2)  | -7(2)  |
| C20 | 32(2) | 53(2) | 41(2) | 7(2)   | 6(2)  | -4(2)  |
| C21 | 38(2) | 38(2) | 50(2) | 4(2)   | 6(2)  | 0(2)   |
| C22 | 33(2) | 40(2) | 37(2) | -7(2)  | 4(2)  | -1(2)  |
| C23 | 43(2) | 39(2) | 52(3) | -13(2) | 2(2)  | -8(2)  |
| C24 | 69(4) | 75(4) | 50(3) | 25(3)  | 3(3)  | -2(3)  |
| C25 | 40(2) | 29(2) | 29(2) | -7(1)  | 3(2)  | -6(2)  |
| C26 | 47(2) | 37(2) | 33(2) | -3(2)  | -1(2) | -1(2)  |
| C27 | 40(2) | 54(3) | 39(2) | -8(2)  | -3(2) | 1(2)   |
| C28 | 41(2) | 48(2) | 37(2) | -12(2) | 7(2)  | -6(2)  |
| C29 | 47(2) | 38(2) | 38(2) | 2(2)   | 7(2)  | -6(2)  |
| C30 | 35(2) | 32(2) | 42(2) | -2(2)  | 2(2)  | -3(2)  |
| C31 | 55(3) | 63(3) | 52(3) | 18(2)  | -4(2) | 8(2)   |
| C32 | 45(3) | 87(4) | 52(3) | -8(3)  | 13(2) | -11(3) |
| C33 | 30(2) | 29(2) | 37(2) | -1(2)  | 0(2)  | -2(1)  |
| C34 | 41(2) | 29(2) | 40(2) | 2(2)   | 6(2)  | -3(2)  |
| C35 | 45(2) | 37(2) | 41(2) | 9(2)   | -2(2) | -2(2)  |
| C36 | 34(2) | 38(2) | 49(2) | 8(2)   | -4(2) | -1(2)  |
| C37 | 37(2) | 51(2) | 43(2) | 2(2)   | 7(2)  | 8(2)   |
| C38 | 39(2) | 47(2) | 34(2) | 0(2)   | 1(2)  | 8(2)   |
| C39 | 51(3) | 63(3) | 42(2) | 8(2)   | 12(2) | 4(2)   |
| C40 | 42(3) | 65(3) | 56(3) | 14(2)  | -5(2) | 6(2)   |
| C41 | 39(2) | 28(2) | 32(2) | -4(1)  | 11(2) | -7(2)  |
| C42 | 40(2) | 29(2) | 31(2) | -4(1)  | 6(2)  | -4(2)  |
| C43 | 42(2) | 33(2) | 37(2) | -6(2)  | 11(2) | 1(2)   |
| C44 | 43(2) | 40(2) | 40(2) | 2(2)   | 8(2)  | -2(2)  |
| C45 | 43(2) | 55(3) | 33(2) | -9(2)  | 4(2)  | -9(2)  |
| C46 | 44(2) | 41(2) | 36(2) | -13(2) | 8(2)  | -5(2)  |
| C47 | 46(2) | 55(3) | 36(2) | -16(2) | 5(2)  | 3(2)   |

|     |        |        |         |        |       |        |
|-----|--------|--------|---------|--------|-------|--------|
| C48 | 45(3)  | 79(4)  | 51(3)   | -4(3)  | -2(2) | 7(3)   |
| P1  | 26(1)  | 26(1)  | 33(1)   | 0(1)   | 0(1)  | 0(1)   |
| C49 | 29(2)  | 34(2)  | 37(2)   | -1(2)  | 2(2)  | -5(2)  |
| C50 | 38(2)  | 50(2)  | 38(2)   | 6(2)   | 0(2)  | -1(2)  |
| C51 | 55(3)  | 54(3)  | 41(2)   | 11(2)  | 0(2)  | -12(2) |
| C52 | 48(3)  | 59(3)  | 41(2)   | -3(2)  | 11(2) | -19(2) |
| C53 | 35(2)  | 58(3)  | 54(3)   | 1(2)   | 11(2) | -5(2)  |
| C54 | 33(2)  | 42(2)  | 45(2)   | 2(2)   | 4(2)  | 0(2)   |
| C55 | 25(2)  | 26(2)  | 32(2)   | -1(1)  | 2(1)  | 1(1)   |
| C56 | 27(2)  | 30(2)  | 37(2)   | -3(2)  | -2(2) | -1(1)  |
| C57 | 34(2)  | 27(2)  | 45(2)   | 1(2)   | 4(2)  | -3(2)  |
| C58 | 33(2)  | 33(2)  | 41(2)   | 6(2)   | 3(2)  | 8(2)   |
| C59 | 29(2)  | 39(2)  | 39(2)   | 1(2)   | -5(2) | 1(2)   |
| C60 | 32(2)  | 29(2)  | 41(2)   | 1(2)   | -3(2) | -6(2)  |
| C61 | 28(2)  | 28(2)  | 36(2)   | 0(2)   | -2(2) | 1(1)   |
| C62 | 50(2)  | 29(2)  | 44(2)   | -1(2)  | 12(2) | -4(2)  |
| C63 | 57(3)  | 41(2)  | 43(2)   | -4(2)  | 11(2) | 2(2)   |
| C64 | 60(3)  | 35(2)  | 45(2)   | -9(2)  | -4(2) | 9(2)   |
| C65 | 60(3)  | 25(2)  | 50(3)   | -1(2)  | -2(2) | -1(2)  |
| C66 | 44(2)  | 29(2)  | 38(2)   | 3(2)   | 0(2)  | 0(2)   |
| C67 | 26(2)  | 34(2)  | 32(2)   | 2(2)   | -1(1) | 1(1)   |
| C68 | 34(2)  | 47(2)  | 45(2)   | -6(2)  | 0(2)  | 5(2)   |
| C69 | 28(2)  | 67(3)  | 57(3)   | -6(2)  | -2(2) | 14(2)  |
| C70 | 28(2)  | 69(3)  | 43(2)   | 0(2)   | -5(2) | -3(2)  |
| C71 | 37(2)  | 46(2)  | 39(2)   | -4(2)  | -4(2) | -4(2)  |
| C72 | 33(2)  | 38(2)  | 33(2)   | -1(2)  | -2(2) | 2(2)   |
| Cl1 | 81(1)  | 105(2) | 132(2)  | -39(1) | 6(1)  | 11(1)  |
| Cl2 | 111(1) | 74(1)  | 82(1)   | -10(1) | 37(1) | -22(1) |
| C73 | 59(4)  | 136(8) | 264(13) | 143(9) | 22(6) | 7(5)   |

---

**Table S4.** Bond lengths [Å] for Ag<sub>3</sub>Cu<sub>2</sub>(SPhMe<sub>2</sub>)<sub>6</sub>.

---

|         |            |
|---------|------------|
| Ag1-Cu1 | 2.9156(6)  |
| Ag1-S1  | 2.3925(11) |
| Ag1-Ag2 | 3.3519(6)  |
| Ag1-Cu2 | 2.9269(6)  |
| Ag1-Ag3 | 3.2490(5)  |
| Ag1-S3  | 2.3860(11) |
| C1-S1   | 1.790(4)   |
| C1-C2   | 1.403(6)   |
| C1-C6   | 1.388(6)   |
| Cu1-S1  | 2.2752(12) |
| Cu1-S2  | 2.2553(12) |
| Cu1-Ag2 | 3.0390(6)  |
| Cu1-Ag3 | 2.8711(6)  |
| Cu1-S6  | 2.3209(12) |
| S2-Ag2  | 2.3800(11) |
| S2-C9   | 1.793(4)   |
| Ag2-Cu2 | 2.9944(6)  |
| Ag2-S4  | 2.3791(10) |
| Cu2-Ag3 | 2.9423(6)  |
| Cu2-S3  | 2.3381(11) |
| Cu2-S4  | 2.2715(12) |
| Cu2-S5  | 2.2758(11) |
| C2-C3   | 1.397(6)   |
| C2-C7   | 1.505(7)   |
| Ag3-S5  | 2.3874(10) |
| Ag3-S6  | 2.3979(10) |
| S3-C17  | 1.786(4)   |
| C3-H3   | 0.9500     |
| C3-C4   | 1.390(7)   |
| S4-C25  | 1.799(4)   |

|          |          |
|----------|----------|
| C4-C5    | 1.375(7) |
| C4-C8    | 1.515(7) |
| S5-C33   | 1.787(4) |
| C5-H5    | 0.9500   |
| C5-C6    | 1.380(6) |
| C6-H6    | 0.9500   |
| S6-C41   | 1.783(4) |
| C7-H7A   | 0.9800   |
| C7-H7B   | 0.9800   |
| C7-H7C   | 0.9800   |
| C8-H8A   | 0.9800   |
| C8-H8B   | 0.9800   |
| C8-H8C   | 0.9800   |
| C9-C10   | 1.401(6) |
| C9-C14   | 1.386(6) |
| C10-C11  | 1.383(6) |
| C10-C15  | 1.511(6) |
| C11-H11  | 0.9500   |
| C11-C12  | 1.389(7) |
| C12-C13  | 1.372(7) |
| C12-C16  | 1.505(7) |
| C13-H13  | 0.9500   |
| C13-C14  | 1.384(7) |
| C14-H14  | 0.9500   |
| C15-H15A | 0.9800   |
| C15-H15B | 0.9800   |
| C15-H15C | 0.9800   |
| C16-H16A | 0.9800   |
| C16-H16B | 0.9800   |
| C16-H16C | 0.9800   |
| C17-C18  | 1.406(5) |
| C17-C22  | 1.392(5) |

|          |          |
|----------|----------|
| C18-C19  | 1.385(6) |
| C18-C23  | 1.505(6) |
| C19-H19  | 0.9500   |
| C19-C20  | 1.393(6) |
| C20-C21  | 1.392(6) |
| C20-C24  | 1.496(6) |
| C21-H21  | 0.9500   |
| C21-C22  | 1.385(6) |
| C22-H22  | 0.9500   |
| C23-H23A | 0.9800   |
| C23-H23B | 0.9800   |
| C23-H23C | 0.9800   |
| C24-H24A | 0.9800   |
| C24-H24B | 0.9800   |
| C24-H24C | 0.9800   |
| C25-C26  | 1.396(6) |
| C25-C30  | 1.391(6) |
| C26-C27  | 1.394(6) |
| C26-C31  | 1.504(6) |
| C27-H27  | 0.9500   |
| C27-C28  | 1.393(7) |
| C28-C29  | 1.391(6) |
| C28-C32  | 1.500(6) |
| C29-H29  | 0.9500   |
| C29-C30  | 1.388(6) |
| C30-H30  | 0.9500   |
| C31-H31A | 0.9800   |
| C31-H31B | 0.9800   |
| C31-H31C | 0.9800   |
| C32-H32A | 0.9800   |
| C32-H32B | 0.9800   |
| C32-H32C | 0.9800   |

|          |          |
|----------|----------|
| C33-C34  | 1.400(6) |
| C33-C38  | 1.393(6) |
| C34-C35  | 1.396(6) |
| C34-C39  | 1.509(6) |
| C35-H35  | 0.9500   |
| C35-C36  | 1.388(6) |
| C36-C37  | 1.389(6) |
| C36-C40  | 1.504(6) |
| C37-H37  | 0.9500   |
| C37-C38  | 1.381(6) |
| C38-H38  | 0.9500   |
| C39-H39A | 0.9800   |
| C39-H39B | 0.9800   |
| C39-H39C | 0.9800   |
| C40-H40A | 0.9800   |
| C40-H40B | 0.9800   |
| C40-H40C | 0.9800   |
| C41-C42  | 1.403(5) |
| C41-C46  | 1.400(6) |
| C42-C43  | 1.382(6) |
| C42-C47  | 1.503(5) |
| C43-H43  | 0.9500   |
| C43-C44  | 1.394(6) |
| C44-C45  | 1.388(6) |
| C44-C48  | 1.501(6) |
| C45-H45  | 0.9500   |
| C45-C46  | 1.388(6) |
| C46-H46  | 0.9500   |
| C47-H47A | 0.9800   |
| C47-H47B | 0.9800   |
| C47-H47C | 0.9800   |
| C48-H48A | 0.9800   |



|          |          |
|----------|----------|
| C48-H48B | 0.9800   |
| C48-H48C | 0.9800   |
| P1-C49   | 1.798(4) |
| P1-C55   | 1.799(4) |
| P1-C61   | 1.793(4) |
| P1-C67   | 1.794(4) |
| C49-C50  | 1.390(6) |
| C49-C54  | 1.394(6) |
| C50-H50  | 0.9500   |
| C50-C51  | 1.391(6) |
| C51-H51  | 0.9500   |
| C51-C52  | 1.385(7) |
| C52-H52  | 0.9500   |
| C52-C53  | 1.367(7) |
| C53-H53  | 0.9500   |
| C53-C54  | 1.392(6) |
| C54-H54  | 0.9500   |
| C55-C56  | 1.393(5) |
| C55-C60  | 1.401(5) |
| C56-H56  | 0.9500   |
| C56-C57  | 1.382(5) |
| C57-H57  | 0.9500   |
| C57-C58  | 1.384(6) |
| C58-H58  | 0.9500   |
| C58-C59  | 1.379(6) |
| C59-H59  | 0.9500   |
| C59-C60  | 1.384(5) |
| C60-H60  | 0.9500   |
| C61-C62  | 1.396(6) |
| C61-C66  | 1.395(5) |
| C62-H62  | 0.9500   |
| C62-C63  | 1.387(6) |

|          |           |
|----------|-----------|
| C63-H63  | 0.9500    |
| C63-C64  | 1.374(6)  |
| C64-H64  | 0.9500    |
| C64-C65  | 1.381(7)  |
| C65-H65  | 0.9500    |
| C65-C66  | 1.391(6)  |
| C66-H66  | 0.9500    |
| C67-C68  | 1.392(5)  |
| C67-C72  | 1.395(5)  |
| C68-H68  | 0.9500    |
| C68-C69  | 1.378(6)  |
| C69-H69  | 0.9500    |
| C69-C70  | 1.385(7)  |
| C70-H70  | 0.9500    |
| C70-C71  | 1.379(6)  |
| C71-H71  | 0.9500    |
| C71-C72  | 1.384(6)  |
| C72-H72  | 0.9500    |
| Cl1-C73  | 1.718(10) |
| Cl2-C73  | 1.739(11) |
| C73-H73A | 0.9900    |
| C73-H73B | 0.9900    |

**Table S5.** Bond angles [°] for Ag<sub>3</sub>Cu<sub>2</sub>(SPhMe<sub>2</sub>)<sub>6</sub>.

|             |            |
|-------------|------------|
| Cu1-Ag1-Ag2 | 57.505(13) |
| Cu1-Ag1-Cu2 | 98.821(17) |
| Cu1-Ag1-Ag3 | 55.196(13) |
| S1-Ag1-Cu1  | 49.57(3)   |
| S1-Ag1-Ag2  | 106.21(3)  |
| S1-Ag1-Cu2  | 139.66(3)  |
| S1-Ag1-Ag3  | 83.11(3)   |
| Cu2-Ag1-Ag2 | 56.479(12) |
| Cu2-Ag1-Ag3 | 56.613(13) |
| Ag3-Ag1-Ag2 | 63.664(12) |
| S3-Ag1-Cu1  | 143.99(3)  |
| S3-Ag1-S1   | 166.42(4)  |
| S3-Ag1-Ag2  | 86.99(3)   |
| S3-Ag1-Cu2  | 50.98(3)   |
| S3-Ag1-Ag3  | 106.18(3)  |
| C2-C1-S1    | 122.0(3)   |
| C6-C1-S1    | 119.5(3)   |
| C6-C1-C2    | 118.4(4)   |
| Ag1-Cu1-Ag2 | 68.479(14) |
| S1-Cu1-Ag1  | 53.17(3)   |
| S1-Cu1-Ag2  | 120.52(3)  |
| S1-Cu1-Ag3  | 94.36(3)   |
| S1-Cu1-S6   | 116.92(4)  |
| S2-Cu1-Ag1  | 101.31(3)  |
| S2-Cu1-S1   | 127.15(4)  |
| S2-Cu1-Ag2  | 50.83(3)   |
| S2-Cu1-Ag3  | 120.13(3)  |
| S2-Cu1-S6   | 115.78(4)  |
| Ag3-Cu1-Ag1 | 68.309(14) |
| Ag3-Cu1-Ag2 | 72.146(14) |
| S6-Cu1-Ag1  | 120.93(3)  |

|             |            |
|-------------|------------|
| S6-Cu1-Ag2  | 100.89(3)  |
| S6-Cu1-Ag3  | 53.75(3)   |
| C1-S1-Ag1   | 105.81(13) |
| C1-S1-Cu1   | 109.60(13) |
| Cu1-S1-Ag1  | 77.26(3)   |
| Cu1-S2-Ag2  | 81.89(4)   |
| C9-S2-Cu1   | 112.16(15) |
| C9-S2-Ag2   | 107.21(14) |
| Cu1-Ag2-Ag1 | 54.016(12) |
| S2-Ag2-Ag1  | 87.37(3)   |
| S2-Ag2-Cu1  | 47.28(3)   |
| S2-Ag2-Cu2  | 139.78(3)  |
| Cu2-Ag2-Ag1 | 54.577(12) |
| Cu2-Ag2-Cu1 | 94.672(16) |
| S4-Ag2-Ag1  | 100.73(3)  |
| S4-Ag2-Cu1  | 139.58(3)  |
| S4-Ag2-S2   | 171.79(4)  |
| S4-Ag2-Cu2  | 48.36(3)   |
| Ag1-Cu2-Ag2 | 68.944(14) |
| Ag1-Cu2-Ag3 | 67.225(13) |
| Ag3-Cu2-Ag2 | 71.831(14) |
| S3-Cu2-Ag1  | 52.46(3)   |
| S3-Cu2-Ag2  | 96.79(3)   |
| S3-Cu2-Ag3  | 117.94(3)  |
| S4-Cu2-Ag1  | 117.49(3)  |
| S4-Cu2-Ag2  | 51.51(3)   |
| S4-Cu2-Ag3  | 105.51(3)  |
| S4-Cu2-S3   | 113.26(4)  |
| S4-Cu2-S5   | 125.30(4)  |
| S5-Cu2-Ag1  | 99.65(3)   |
| S5-Cu2-Ag2  | 122.01(3)  |
| S5-Cu2-Ag3  | 52.59(3)   |

|             |            |
|-------------|------------|
| S5-Cu2-S3   | 121.23(4)  |
| C1-C2-C7    | 121.9(4)   |
| C3-C2-C1    | 118.5(4)   |
| C3-C2-C7    | 119.6(4)   |
| Cu1-Ag3-Ag1 | 56.494(13) |
| Cu1-Ag3-Cu2 | 99.486(17) |
| Cu2-Ag3-Ag1 | 56.162(12) |
| S5-Ag3-Ag1  | 88.98(3)   |
| S5-Ag3-Cu1  | 144.70(3)  |
| S5-Ag3-Cu2  | 49.21(3)   |
| S5-Ag3-S6   | 163.96(4)  |
| S6-Ag3-Ag1  | 106.93(3)  |
| S6-Ag3-Cu1  | 51.31(3)   |
| S6-Ag3-Cu2  | 142.74(3)  |
| Cu2-S3-Ag1  | 76.56(3)   |
| C17-S3-Ag1  | 108.96(13) |
| C17-S3-Cu2  | 107.77(12) |
| C2-C3-H3    | 118.7      |
| C4-C3-C2    | 122.5(4)   |
| C4-C3-H3    | 118.7      |
| Cu2-S4-Ag2  | 80.12(4)   |
| C25-S4-Ag2  | 106.17(12) |
| C25-S4-Cu2  | 113.94(14) |
| C3-C4-C8    | 120.7(5)   |
| C5-C4-C3    | 117.9(4)   |
| C5-C4-C8    | 121.3(5)   |
| Cu2-S5-Ag3  | 78.20(3)   |
| C33-S5-Cu2  | 112.25(13) |
| C33-S5-Ag3  | 107.34(13) |
| C4-C5-H5    | 119.7      |
| C4-C5-C6    | 120.7(4)   |
| C6-C5-H5    | 119.7      |

|             |            |
|-------------|------------|
| C1-C6-H6    | 119.0      |
| C5-C6-C1    | 121.9(4)   |
| C5-C6-H6    | 119.0      |
| Cu1-S6-Ag3  | 74.93(3)   |
| C41-S6-Cu1  | 108.22(13) |
| C41-S6-Ag3  | 107.57(13) |
| C2-C7-H7A   | 109.5      |
| C2-C7-H7B   | 109.5      |
| C2-C7-H7C   | 109.5      |
| H7A-C7-H7B  | 109.5      |
| H7A-C7-H7C  | 109.5      |
| H7B-C7-H7C  | 109.5      |
| C4-C8-H8A   | 109.5      |
| C4-C8-H8B   | 109.5      |
| C4-C8-H8C   | 109.5      |
| H8A-C8-H8B  | 109.5      |
| H8A-C8-H8C  | 109.5      |
| H8B-C8-H8C  | 109.5      |
| C10-C9-S2   | 120.5(3)   |
| C14-C9-S2   | 120.8(4)   |
| C14-C9-C10  | 118.6(4)   |
| C9-C10-C15  | 121.5(4)   |
| C11-C10-C9  | 118.3(4)   |
| C11-C10-C15 | 120.2(4)   |
| C10-C11-H11 | 118.3      |
| C10-C11-C12 | 123.4(5)   |
| C12-C11-H11 | 118.3      |
| C11-C12-C16 | 121.2(5)   |
| C13-C12-C11 | 117.2(4)   |
| C13-C12-C16 | 121.7(5)   |
| C12-C13-H13 | 119.4      |
| C12-C13-C14 | 121.1(5)   |

|               |          |
|---------------|----------|
| C14-C13-H13   | 119.4    |
| C9-C14-H14    | 119.3    |
| C13-C14-C9    | 121.3(5) |
| C13-C14-H14   | 119.3    |
| C10-C15-H15A  | 109.5    |
| C10-C15-H15B  | 109.5    |
| C10-C15-H15C  | 109.5    |
| H15A-C15-H15B | 109.5    |
| H15A-C15-H15C | 109.5    |
| H15B-C15-H15C | 109.5    |
| C12-C16-H16A  | 109.5    |
| C12-C16-H16B  | 109.5    |
| C12-C16-H16C  | 109.5    |
| H16A-C16-H16B | 109.5    |
| H16A-C16-H16C | 109.5    |
| H16B-C16-H16C | 109.5    |
| C18-C17-S3    | 118.3(3) |
| C22-C17-S3    | 122.3(3) |
| C22-C17-C18   | 119.3(4) |
| C17-C18-C23   | 121.1(4) |
| C19-C18-C17   | 118.5(4) |
| C19-C18-C23   | 120.3(4) |
| C18-C19-H19   | 118.4    |
| C18-C19-C20   | 123.2(4) |
| C20-C19-H19   | 118.4    |
| C19-C20-C24   | 121.1(4) |
| C21-C20-C19   | 116.7(4) |
| C21-C20-C24   | 122.2(5) |
| C20-C21-H21   | 119.1    |
| C22-C21-C20   | 121.8(4) |
| C22-C21-H21   | 119.1    |
| C17-C22-H22   | 119.8    |

|               |          |
|---------------|----------|
| C21-C22-C17   | 120.4(4) |
| C21-C22-H22   | 119.8    |
| C18-C23-H23A  | 109.5    |
| C18-C23-H23B  | 109.5    |
| C18-C23-H23C  | 109.5    |
| H23A-C23-H23B | 109.5    |
| H23A-C23-H23C | 109.5    |
| H23B-C23-H23C | 109.5    |
| C20-C24-H24A  | 109.5    |
| C20-C24-H24B  | 109.5    |
| C20-C24-H24C  | 109.5    |
| H24A-C24-H24B | 109.5    |
| H24A-C24-H24C | 109.5    |
| H24B-C24-H24C | 109.5    |
| C26-C25-S4    | 119.1(3) |
| C30-C25-S4    | 121.6(3) |
| C30-C25-C26   | 119.2(4) |
| C25-C26-C31   | 121.6(4) |
| C27-C26-C25   | 118.5(4) |
| C27-C26-C31   | 119.9(4) |
| C26-C27-H27   | 118.4    |
| C28-C27-C26   | 123.2(4) |
| C28-C27-H27   | 118.4    |
| C27-C28-C32   | 121.3(4) |
| C29-C28-C27   | 117.0(4) |
| C29-C28-C32   | 121.7(4) |
| C28-C29-H29   | 119.5    |
| C30-C29-C28   | 121.0(4) |
| C30-C29-H29   | 119.5    |
| C25-C30-H30   | 119.5    |
| C29-C30-C25   | 121.1(4) |
| C29-C30-H30   | 119.5    |



|               |          |
|---------------|----------|
| C26-C31-H31A  | 109.5    |
| C26-C31-H31B  | 109.5    |
| C26-C31-H31C  | 109.5    |
| H31A-C31-H31B | 109.5    |
| H31A-C31-H31C | 109.5    |
| H31B-C31-H31C | 109.5    |
| C28-C32-H32A  | 109.5    |
| C28-C32-H32B  | 109.5    |
| C28-C32-H32C  | 109.5    |
| H32A-C32-H32B | 109.5    |
| H32A-C32-H32C | 109.5    |
| H32B-C32-H32C | 109.5    |
| C34-C33-S5    | 120.9(3) |
| C38-C33-S5    | 119.4(3) |
| C38-C33-C34   | 119.6(4) |
| C33-C34-C39   | 122.2(4) |
| C35-C34-C33   | 118.2(4) |
| C35-C34-C39   | 119.5(4) |
| C34-C35-H35   | 118.8    |
| C36-C35-C34   | 122.5(4) |
| C36-C35-H35   | 118.8    |
| C35-C36-C37   | 118.2(4) |
| C35-C36-C40   | 121.6(4) |
| C37-C36-C40   | 120.2(4) |
| C36-C37-H37   | 119.7    |
| C38-C37-C36   | 120.6(4) |
| C38-C37-H37   | 119.7    |
| C33-C38-H38   | 119.5    |
| C37-C38-C33   | 121.0(4) |
| C37-C38-H38   | 119.5    |
| C34-C39-H39A  | 109.5    |
| C34-C39-H39B  | 109.5    |

|               |          |
|---------------|----------|
| C34-C39-H39C  | 109.5    |
| H39A-C39-H39B | 109.5    |
| H39A-C39-H39C | 109.5    |
| H39B-C39-H39C | 109.5    |
| C36-C40-H40A  | 109.5    |
| C36-C40-H40B  | 109.5    |
| C36-C40-H40C  | 109.5    |
| H40A-C40-H40B | 109.5    |
| H40A-C40-H40C | 109.5    |
| H40B-C40-H40C | 109.5    |
| C42-C41-S6    | 119.1(3) |
| C46-C41-S6    | 122.4(3) |
| C46-C41-C42   | 118.5(4) |
| C41-C42-C47   | 120.9(4) |
| C43-C42-C41   | 118.8(4) |
| C43-C42-C47   | 120.3(4) |
| C42-C43-H43   | 118.3    |
| C42-C43-C44   | 123.3(4) |
| C44-C43-H43   | 118.3    |
| C43-C44-C48   | 121.0(4) |
| C45-C44-C43   | 117.2(4) |
| C45-C44-C48   | 121.7(4) |
| C44-C45-H45   | 119.6    |
| C46-C45-C44   | 120.8(4) |
| C46-C45-H45   | 119.6    |
| C41-C46-H46   | 119.4    |
| C45-C46-C41   | 121.3(4) |
| C45-C46-H46   | 119.4    |
| C42-C47-H47A  | 109.5    |
| C42-C47-H47B  | 109.5    |
| C42-C47-H47C  | 109.5    |
| H47A-C47-H47B | 109.5    |

|               |            |
|---------------|------------|
| H47A-C47-H47C | 109.5      |
| H47B-C47-H47C | 109.5      |
| C44-C48-H48A  | 109.5      |
| C44-C48-H48B  | 109.5      |
| C44-C48-H48C  | 109.5      |
| H48A-C48-H48B | 109.5      |
| H48A-C48-H48C | 109.5      |
| H48B-C48-H48C | 109.5      |
| C49-P1-C55    | 109.85(18) |
| C61-P1-C49    | 111.51(18) |
| C61-P1-C55    | 106.69(17) |
| C61-P1-C67    | 108.98(18) |
| C67-P1-C49    | 108.56(18) |
| C67-P1-C55    | 111.26(17) |
| C50-C49-P1    | 118.5(3)   |
| C50-C49-C54   | 120.2(4)   |
| C54-C49-P1    | 121.3(3)   |
| C49-C50-H50   | 120.4      |
| C49-C50-C51   | 119.2(4)   |
| C51-C50-H50   | 120.4      |
| C50-C51-H51   | 119.8      |
| C52-C51-C50   | 120.3(4)   |
| C52-C51-H51   | 119.8      |
| C51-C52-H52   | 119.7      |
| C53-C52-C51   | 120.5(4)   |
| C53-C52-H52   | 119.7      |
| C52-C53-H53   | 119.9      |
| C52-C53-C54   | 120.2(4)   |
| C54-C53-H53   | 119.9      |
| C49-C54-H54   | 120.2      |
| C53-C54-C49   | 119.6(4)   |
| C53-C54-H54   | 120.2      |

|             |          |
|-------------|----------|
| C56-C55-P1  | 123.3(3) |
| C56-C55-C60 | 119.5(3) |
| C60-C55-P1  | 117.1(3) |
| C55-C56-H56 | 120.1    |
| C57-C56-C55 | 119.7(3) |
| C57-C56-H56 | 120.1    |
| C56-C57-H57 | 119.7    |
| C56-C57-C58 | 120.6(4) |
| C58-C57-H57 | 119.7    |
| C57-C58-H58 | 120.0    |
| C59-C58-C57 | 120.0(4) |
| C59-C58-H58 | 120.0    |
| C58-C59-H59 | 119.9    |
| C58-C59-C60 | 120.3(4) |
| C60-C59-H59 | 119.9    |
| C55-C60-H60 | 120.1    |
| C59-C60-C55 | 119.9(3) |
| C59-C60-H60 | 120.1    |
| C62-C61-P1  | 116.8(3) |
| C66-C61-P1  | 123.5(3) |
| C66-C61-C62 | 119.7(4) |
| C61-C62-H62 | 119.8    |
| C63-C62-C61 | 120.3(4) |
| C63-C62-H62 | 119.8    |
| C62-C63-H63 | 120.1    |
| C64-C63-C62 | 119.9(4) |
| C64-C63-H63 | 120.1    |
| C63-C64-H64 | 119.9    |
| C63-C64-C65 | 120.2(4) |
| C65-C64-H64 | 119.9    |
| C64-C65-H65 | 119.6    |
| C64-C65-C66 | 120.8(4) |

|               |          |
|---------------|----------|
| C66-C65-H65   | 119.6    |
| C61-C66-H66   | 120.5    |
| C65-C66-C61   | 119.0(4) |
| C65-C66-H66   | 120.5    |
| C68-C67-P1    | 121.1(3) |
| C68-C67-C72   | 119.9(4) |
| C72-C67-P1    | 119.0(3) |
| C67-C68-H68   | 120.1    |
| C69-C68-C67   | 119.8(4) |
| C69-C68-H68   | 120.1    |
| C68-C69-H69   | 119.8    |
| C68-C69-C70   | 120.4(4) |
| C70-C69-H69   | 119.8    |
| C69-C70-H70   | 120.0    |
| C71-C70-C69   | 120.1(4) |
| C71-C70-H70   | 120.0    |
| C70-C71-H71   | 119.9    |
| C70-C71-C72   | 120.3(4) |
| C72-C71-H71   | 119.9    |
| C67-C72-H72   | 120.2    |
| C71-C72-C67   | 119.6(4) |
| C71-C72-H72   | 120.2    |
| Cl1-C73-Cl2   | 115.4(4) |
| Cl1-C73-H73A  | 108.4    |
| Cl1-C73-H73B  | 108.4    |
| Cl2-C73-H73A  | 108.4    |
| Cl2-C73-H73B  | 108.4    |
| H73A-C73-H73B | 107.5    |

---

Symmetry transformations used to generate equivalent atoms.

## S5. DFT and TDDFT Calculations

All density functional theory (DFT) and time-dependent density functional theory (TD-DFT) calculations were carried out using Gaussian09.

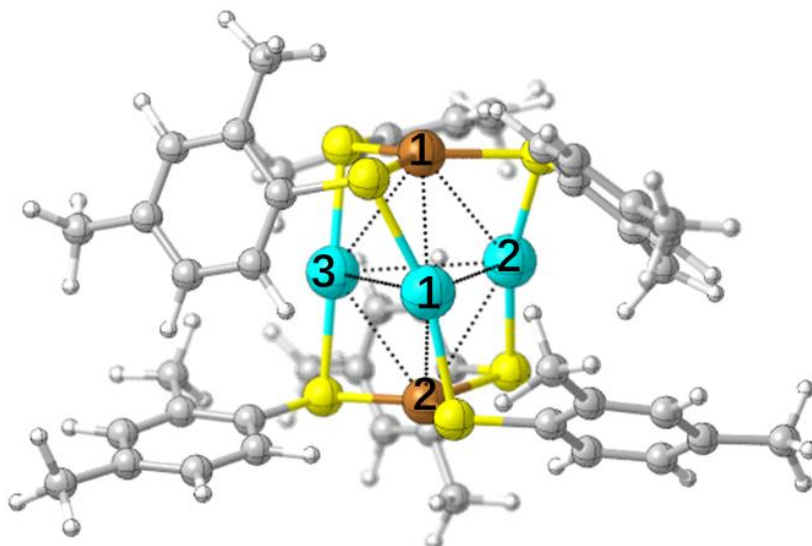

**Fig. S7** The numbering of  $\text{Ag}_3\text{Cu}_2$  in  $[\text{Ag}_3\text{Cu}_2(\text{SPhMe}_2)_6]^-$  at the BP86 optimized  $S_0$  minimum.

**Table S6.** DFT computed bond lengths (B.L. in Å) and Mayer bond orders (B.O.) of selected bonds in  $[\text{Ag}_3\text{Cu}_2(\text{SPhMe}_2)_6]^-$  at the  $S_0$  minimum.

|              |         |         |         |         |         |         |         |
|--------------|---------|---------|---------|---------|---------|---------|---------|
| <b>Bonds</b> | Ag1-Ag2 | Ag2-Ag3 | Ag3-Ag1 | Ag1-Cu2 | Ag2-Cu2 | Ag3-Cu2 | Ag1-Cu1 |
| B.L.         | 3.312   | 3.421   | 3.261   | 2.874   | 2.967   | 2.881   | 2.862   |
| B.O.         | 0.14    | 0.09    | 0.19    | 0.09    | 0.05    | 0.11    | 0.13    |
| <b>Bonds</b> | Ag2-Cu1 | Ag3-Cu1 | Ag1-S   | Ag2-S   | Ag3-S   | Cu1-S   | Cu2-S   |
| B.L.         | 2.991   | 2.907   | 2.438   | 2.432   | 2.436   | 2.325   | 2.325   |
| B.O.         | 0.06    | 0.07    | 0.47    | 0.38    | 0.45    | 0.65    | 0.66    |

**Table S7.** DFT computed natural population analysis (NPA) charges of several key atoms in  $[\text{Ag}_3\text{Cu}_2(\text{SPhMe}_2)_6]^-$  at the  $S_0$  minimum.

|       |      |      |      |      |      |         |
|-------|------|------|------|------|------|---------|
| Atoms | Ag1  | Ag2  | Ag3  | Cu1  | Cu2  | S (avg) |
| NPA   | 0.29 | 0.33 | 0.30 | 0.05 | 0.05 | -0.22   |

**Table S8.** TD-DFT computed wavelengths (nm, kcal/mol in brackets), oscillator strengths, and weights of electronic configurations (in %) of strong electronic excitation transitions at the optimized  $S_0$  minimum of  $[\text{Ag}_3\text{Cu}_2(\text{SPhMe}_2)_6]^-$ .

| state     | wavelength  | oscillator strength | electronic configuration          |
|-----------|-------------|---------------------|-----------------------------------|
| $S_4$     | 483 (59.2)  | 0.0673              | HOMO-3 $\rightarrow$ LUMO (93)    |
| $S_6$     | 457 (62.6)  | 0.0654              | HOMO-5 $\rightarrow$ LUMO (94)    |
| $S_{11}$  | 388 (73.7)  | 0.0245              | HOMO-1 $\rightarrow$ LUMO+1 (72)  |
| $S_{88}$  | 320 (89.3)  | 0.0429              | HOMO-3 $\rightarrow$ LUMO+10 (37) |
| $S_{226}$ | 267 (107.1) | 0.0224              | HOMO-2 $\rightarrow$ LUMO+19 (26) |

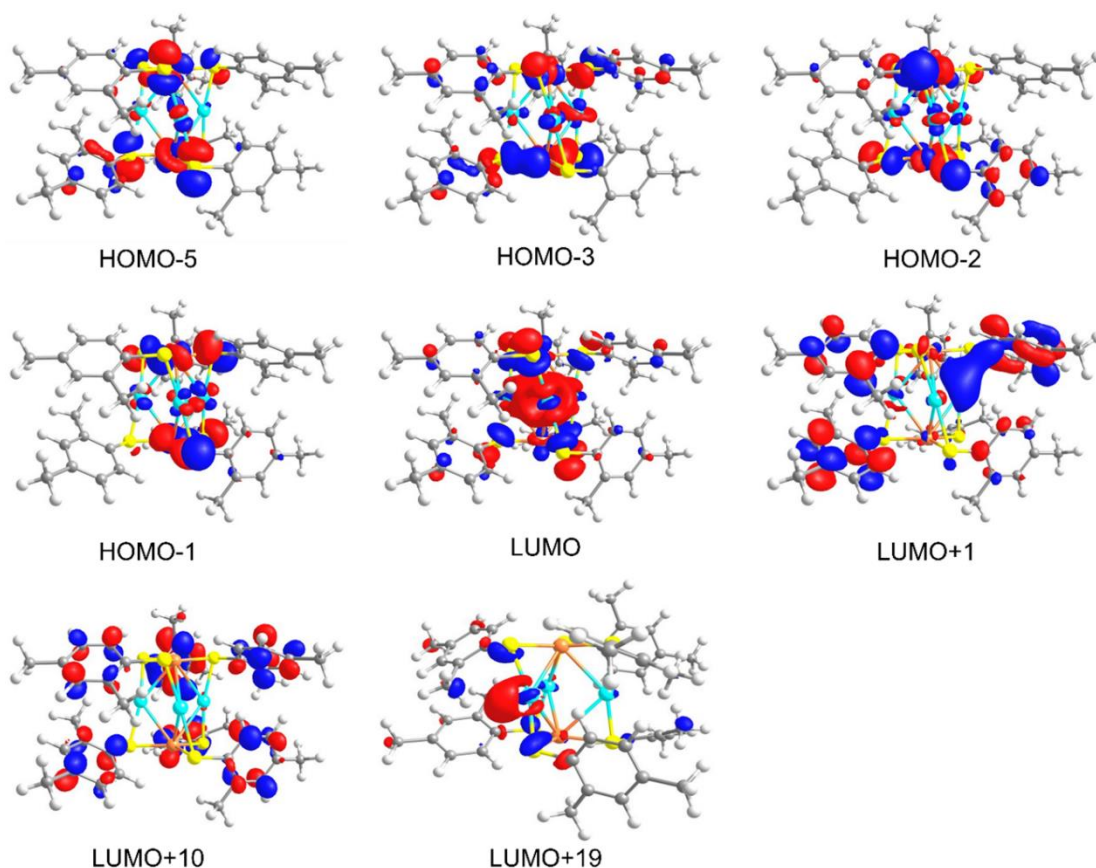

**Fig. S8** TD-DFT calculated frontier molecular orbitals of  $[\text{Ag}_3\text{Cu}_2(\text{SPhMe}_2)_6]^-$  at the  $S_0$  minimum.

**Table S9.** TD-DFT computed wavelengths (nm, kcal/mol in brackets), oscillator strengths, and weights of electronic configurations (in %) of strong electronic de-excitation transitions at the optimized  $S_1$  minimum of  $[\text{Ag}_3\text{Cu}_2(\text{SPhMe}_2)_6]^-$ .

| state     | wavelength        | oscillator Strength | electronic configuration       |
|-----------|-------------------|---------------------|--------------------------------|
| <b>S1</b> | <b>833 (34.3)</b> | 0.0083              | LUMO $\rightarrow$ HOMO (99)   |
| <b>S2</b> | 642 (44.5)        | 0.0053              | LUMO $\rightarrow$ HOMO-1 (97) |
| <b>S3</b> | <b>620 (46.1)</b> | 0.0412              | LUMO $\rightarrow$ HOMO-2 (93) |
| <b>S4</b> | 608 (47.0)        | 0.0278              | LUMO $\rightarrow$ HOMO-3 (95) |
| <b>S5</b> | <b>563 (50.8)</b> | 0.0572              | LUMO $\rightarrow$ HOMO-4 (97) |
| <b>S6</b> | 550 (52.0)        | 0.0140              | LUMO $\rightarrow$ HOMO-5 (96) |
| <b>S7</b> | <b>518 (55.2)</b> | 0.0321              | LUMO $\rightarrow$ HOMO-6 (83) |

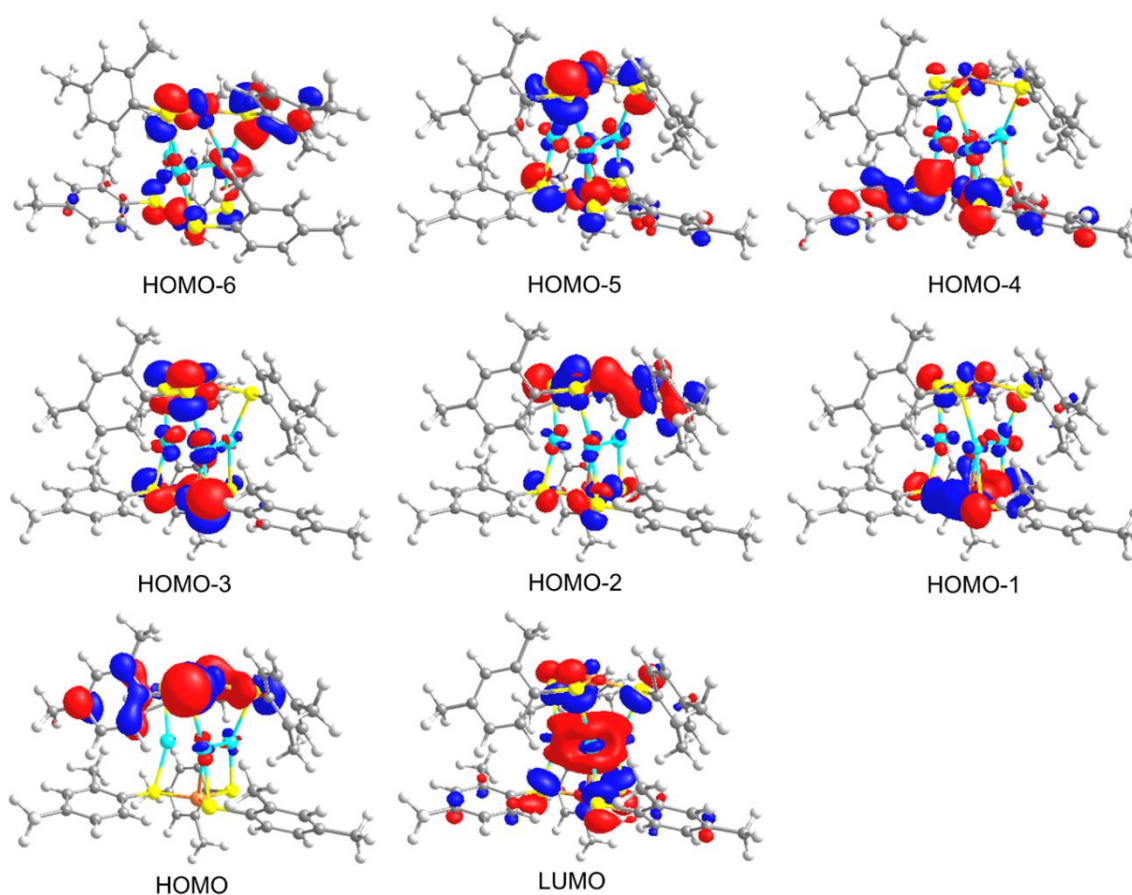

**Fig. S9** TD-DFT calculated frontier molecular orbitals of  $[\text{Ag}_3\text{Cu}_2(\text{SPhMe}_2)_6]^-$  at the  $S_1$  minimum.



**Table S10.** TD-DFT calculated molecular orbital levels (in eV) and relevant weights (in %) with respect to Ag<sub>3</sub>, Cu<sub>2</sub>, and S, C, and H atoms of [Ag<sub>3</sub>Cu<sub>2</sub>(SPhMe<sub>2</sub>)<sub>6</sub>]<sup>-</sup> at its S<sub>1</sub> minimum.

| Orbitals | E (in eV) | Weights (%)              |                          |                    |
|----------|-----------|--------------------------|--------------------------|--------------------|
|          |           | Ag <sub>3</sub> (5sp+4d) | Cu <sub>2</sub> (4sp+3d) | S, C, and H (S+CH) |
| LUMO     | -2.04     | 36.7 (29.7+7.0)          | 8.6 (4.5+4.1)            | 54.6 (36.4+18.2)   |
| HOMO     | -3.48     | 2.6 (1.1+1.5)            | 39.2 (1.7+37.5)          | 58.2 (41.3+16.9)   |
| HOMO-1   | -3.91     | 6.3 (2.2+4.1)            | 34.4 (1.5+32.9)          | 59.3 (40.8+18.5)   |
| HOMO-2   | -3.97     | 3.8 (1.4+2.4)            | 40.3 (0.7+39.6)          | 55.9 (38.5+17.4)   |
| HOMO-3   | -4.02     | 7.7 (0.7+7.0)            | 35.3 (0.8+34.6)          | 57.0 (45.3+11.7)   |
| HOMO-4   | -4.12     | 5.7 (1.8+3.9)            | 31.9 (0.6+31.3)          | 62.4 (38.7+23.7)   |
| HOMO-5   | -4.23     | 4.7 (0.2+4.5)            | 46.0 (1.1+44.9)          | 49.3 (38.6+10.7)   |
| HOMO-6   | -4.36     | 10.8 (5.8+5.0)           | 43.2 (1.0+42.2)          | 76.0 (62.7+13.3)   |

**Table S11.** TD-DFT computed vertical T<sub>1</sub>→S<sub>0</sub> emission wavelength (nm, kcal/mol in bracket) and main electronic configuration at the T<sub>1</sub> minimum of [Ag<sub>3</sub>Cu<sub>2</sub>(SPhMe<sub>2</sub>)<sub>6</sub>]<sup>-</sup>.

| state          | wavelength | oscillator Strength | electronic configuration |
|----------------|------------|---------------------|--------------------------|
| T <sub>1</sub> | 975 (29.3) | 0                   | LUMO → HOMO (100)        |
